# Supplementary material for: Anti-Inflammatory Extract from Soil Algae Chromochloris zofingiensis Targeting TNFR/NF-κB Signaling at Different Levels
Source: MDPI journal article supplement (doi:10.3390/cells11091407), 2022-04-21
Supplement: s1 [file s1]

# Supplementary information

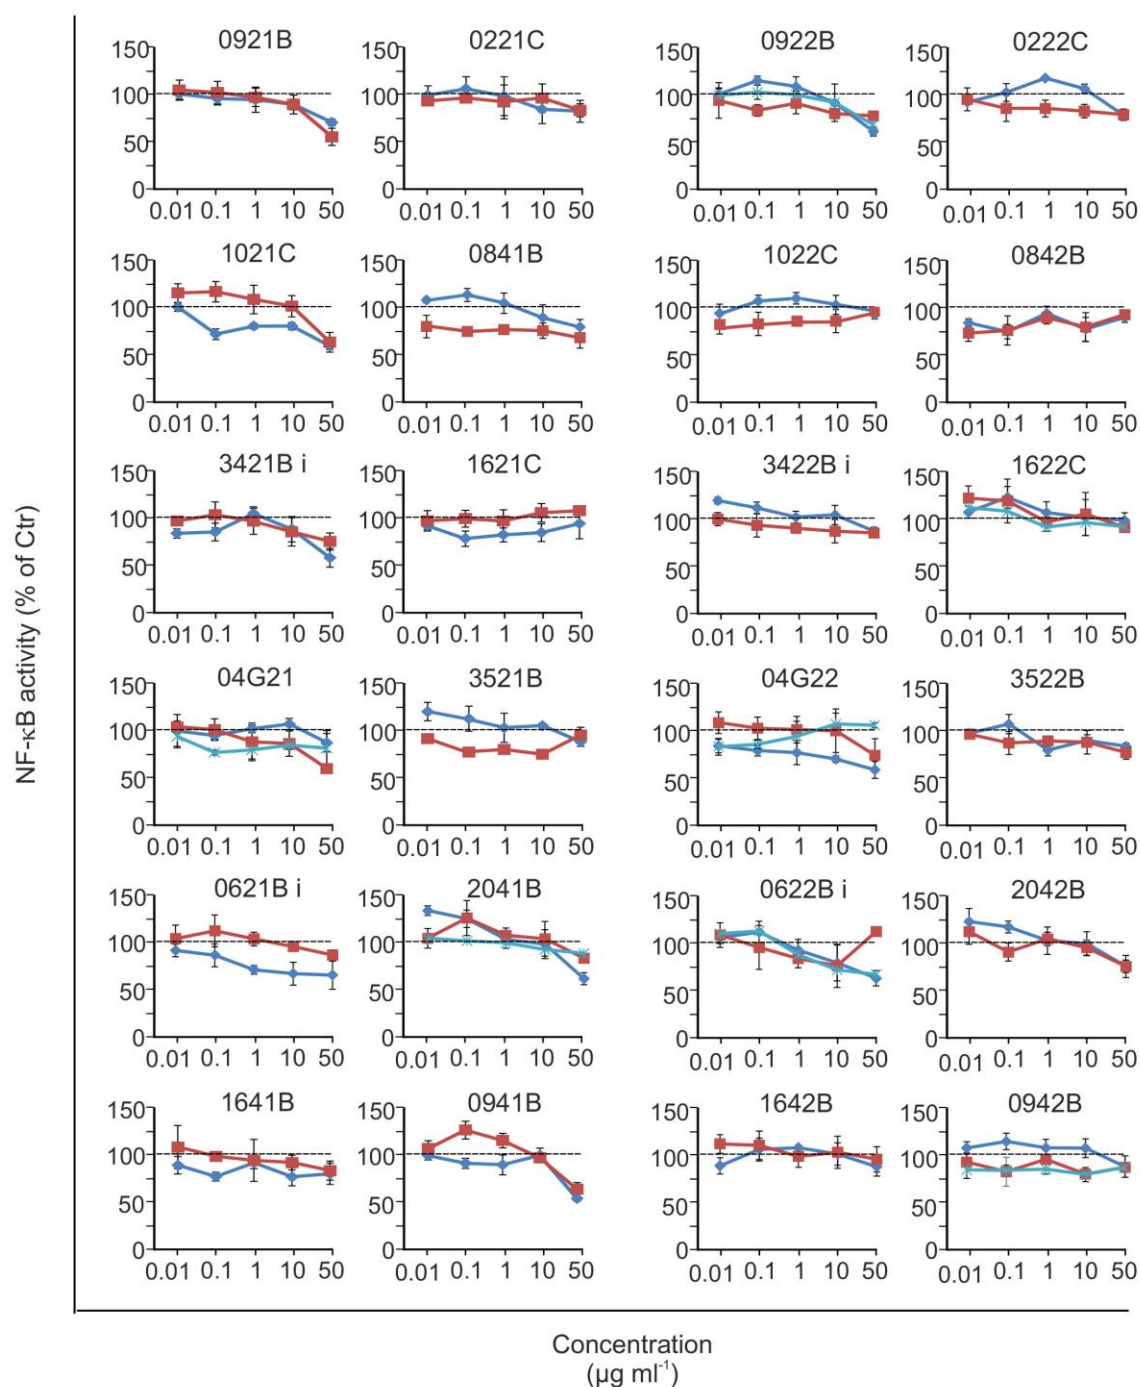

**Figure S1.** Validation of primary hits. Dose-dependent effects on NF- $\kappa$ B luciferase reporter activities of the selected algal extracts in TNF $\alpha$ -stimulated HaCaT cells. NF- $\kappa$ B activity in DMSO-treated cells is normalized to 100%. Each curve represents an independent experiment. Values are mean  $\pm$  SD of technical replicates ( $n = 3$ ); Ctr, control (DMSO + TNF $\alpha$ ).

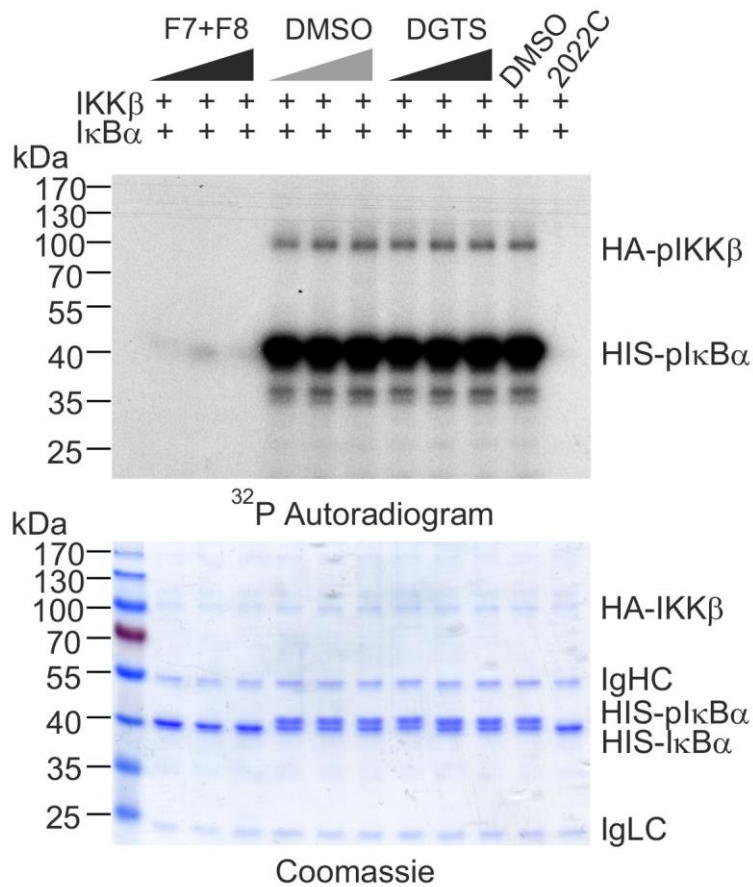

**Figure S2.** The active NAE\_2022C fraction (F7+F8), but not DGTS, directly inhibits IKK $\beta$  kinase activity. IKK $\beta$  activity was analyzed by *in vitro* kinase assay using recombinant HIS-I $\kappa$ B $\alpha$  and [ $\gamma$ -<sup>32</sup>P]ATP in the presence of DMSO, (F7+F8) fraction or DGTS (1, 10, 100  $\mu$ M). The reactions were run on SDS-PAGE and analyzed by autoradiography; IgHC, immunoglobulin heavy chain; IgLC, immunoglobulin light chain.

Figure 3B  
WB: anti-I $\kappa$ B $\alpha$

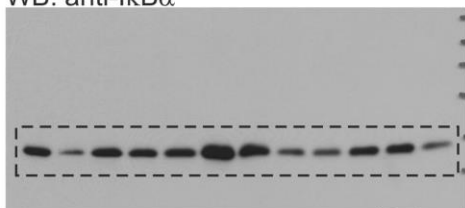

Figure 3B  
WB: anti- $\beta$ -Actin

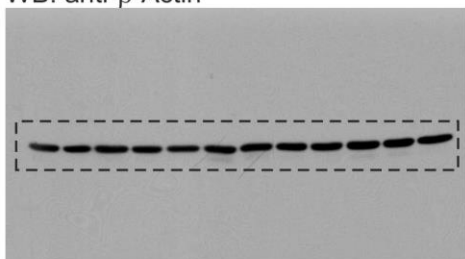

Figure 3B  
WB: anti-pI $\kappa$ B $\alpha$

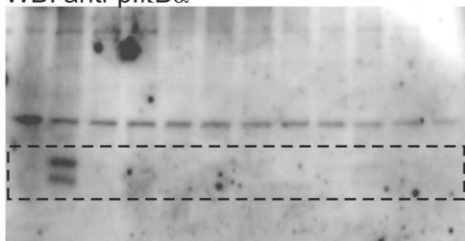

Figure 3B  
WB: anti- $\beta$ -Actin

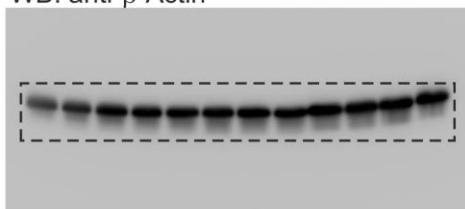

Figure 4A  
WB: anti-I $\kappa$ B $\alpha$

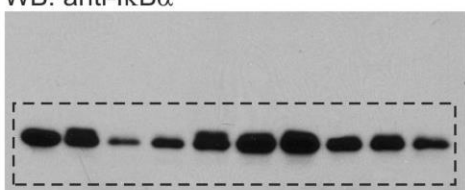

Figure 4A  
WB: anti-pI $\kappa$ B $\alpha$

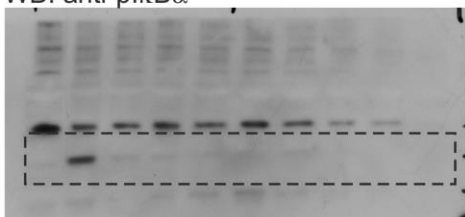

Figure 4A  
WB: anti-pp38

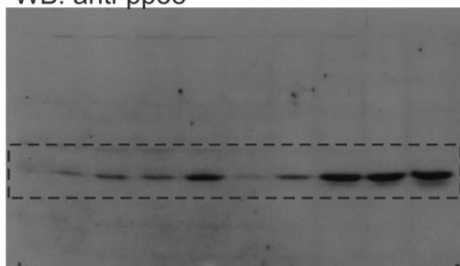

Figure 4A  
WB: anti- $\beta$ -Actin

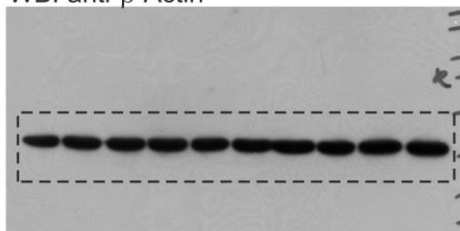

Figure 4A  
WB: anti-pJNK

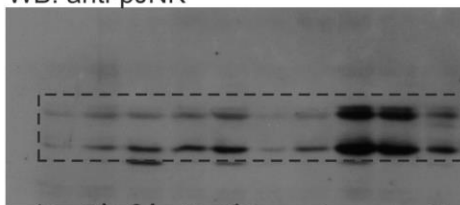

Figure 4A  
WB: anti- $\beta$ -Actin

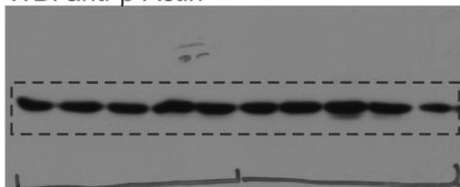

Figure 4A  
WB: anti-pERK1/2

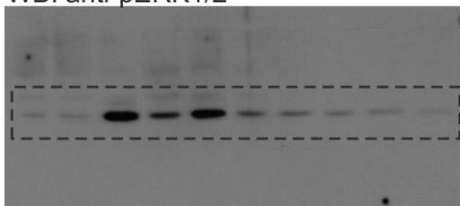

Figure 4A  
WB: anti- $\beta$ -Actin

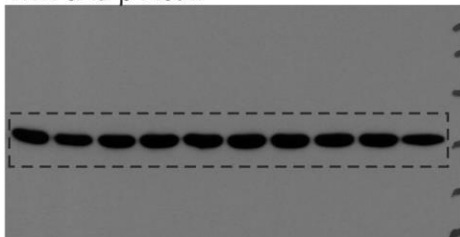

**Figure S3.** Original images. *Dashed line designates the cropped area.*

**Table S1.** List of algae strains selected from the ASIB 505 collection.

| Algae Species                                                                   | Collection ID   | Growth in<br>3N-BBM | PAE ID         | NAE ID         |
|---------------------------------------------------------------------------------|-----------------|---------------------|----------------|----------------|
| <i>Subphylum: Chlorophytina</i>                                                 | IB459           | +++                 | 0121<br>0141   | 0122<br>0142   |
| <i>Coccomyxa subellipsoidea</i>                                                 | BS110           | +++                 | 0221<br>0241   | 0222<br>0242   |
| <i>Klebsormidium subellipsoidea</i> or<br><i>Interphylum subellipsoidea</i>     | IB505           | +++                 | 0321           | 0322           |
| <i>Chromochloris zofingiensis</i><br><i>Order: Sphaeropleales</i>               | V46             | +                   | 04G21<br>04G51 | 04G22<br>04G52 |
| <i>Xanthophyceae</i>                                                            | V168            | +++                 | 0521           | 0522           |
| <i>n.a.</i>                                                                     | IB514           | +++                 | 0621<br>0641   | 0622<br>0642   |
| <i>Coccomyxa subellipsoidea</i>                                                 | T3              | +++                 | 0721           | 0722           |
| <i>Pseudochlorella subsphaerica</i><br><i>Family: Prasiolaceae</i>              | BS775           | +++                 | 0821<br>0841   | 0822<br>0842   |
| <i>Coccomyxa subellipsoidea</i><br><i>Family: Coccomyxaceae</i>                 | IB273<br>(PUFA) | +++                 | 0921<br>0941   | 0922<br>0942   |
| <i>Neocystis brevis</i><br><i>Subphylum Chlorophytina</i>                       | IB410           | +++                 | 1021           | 1022           |
| <i>Bracteacoccus subellipsoidea</i>                                             | V103<br>V219    | +++                 | 1121<br>1221   | 1122<br>1222   |
| <i>Ectocarpus siliculosus</i><br><i>Family: Ectocarpaceae</i>                   | V50             | +++                 | 1321           | 1322           |
| <i>Pseudostichococcus subellipsoidea</i> , <i>Phylum:</i><br><i>Chlorophyta</i> | SAG 379 1c      | +++                 | 1411           | 1412           |
| <i>Trebouxiophyceae subellipsoidea</i>                                          | IB423           | +++                 | 1521           | 1522           |
| <i>Chromochloris zofingiensis</i><br><i>Order: Sphaeropleales</i>               | IB408           | +++                 | 1621<br>1641   | 1622<br>1642   |
| <i>Chlorella saccharophila</i>                                                  | CV. Vulgaris    | +++                 | 1721<br>1741   | 1722<br>1742   |
| <i>Diplosphaera subellipsoidea</i> , <i>Subphylum:</i><br><i>Chlorophytina</i>  | T61             | ++                  | 1821           | 1822           |
| <i>Bracteococcus subellipsoidea</i>                                             | V195            | +                   | 1921           | 1922           |
| <i>Chromochloris zofingiensis</i><br><i>Subphylum: Chlorophytina</i>            | V142            | +++                 | 2021<br>2041   | 2022<br>2042   |
| <i>Edaphochlorella mirabilis</i>                                                | IB407<br>(PUFA) | +++                 | 2121<br>2131   | 2122<br>2132   |

|                                                                      |           |     |      |      |
|----------------------------------------------------------------------|-----------|-----|------|------|
|                                                                      |           |     | 2141 | 2142 |
| <i>n.a.</i>                                                          | V6        | +++ | 2221 | 2222 |
| <i>Bracteacoccus subellipsoidea</i>                                  | T87       | +++ | 2321 | 2322 |
| <i>Scenedesmus subellipsoidea</i>                                    | V21       | +   | 2411 | 2412 |
| <i>Dictyococcus varians</i>                                          | V204      | +++ | 2521 | 2522 |
| Order: <i>Sphaeropleales</i>                                         |           |     | 2551 | 2552 |
| <i>Coccomyxa subellipsoidea</i>                                      | IB256     | +   | 2611 | 2612 |
|                                                                      |           |     | 2641 | 2642 |
| <i>Coccomyxa subellipsoidea</i>                                      | V199      | +++ | 2721 | 2722 |
| <i>Muriella subellipsoidea</i>                                       | BS319     | +++ | 2811 | 2812 |
| <i>n.a.</i>                                                          | V24       | +   | 2911 | 2912 |
| <i>Ettlia texensis</i>                                               | SAG 79.80 | +++ | 3021 | 3022 |
| <i>Bracteacoccus subellipsoidea</i>                                  | V208      | +   | 3111 | 3112 |
| <i>n.a.</i>                                                          | CCALA 496 | ++  | 3221 | 3222 |
| <i>Coelastrella subellipsoidea</i> Subphylum<br><i>Chlorophytina</i> | CH        | +   | 3321 | 3322 |
| <i>Nostoc subellipsoidea</i>                                         | BS363     | +++ | 3421 | 3422 |
| <i>Bracteacoccus subellipsoidea</i>                                  | V208      | +++ | 3521 | 3522 |
| <i>Vischeria helvetica</i><br>Order: <i>Eustigmatales</i>            | V39       | +   | 3611 | 3612 |

**Table S2.** Cytotoxicity of selected algae extracts

| Extract ID | Cell viability (% of control) |          |         |         |
|------------|-------------------------------|----------|---------|---------|
|            | 0.1                           | 1        | 10      | 100     |
|            | (µg ml <sup>-1</sup> )        |          |         |         |
| 0121B i    | 100 ± 6                       | 102 ± 7  | 102 ± 9 | 98 ± 9  |
| 0141B      | 102 ± 3                       | 89 ± 8   | 96 ± 2  | 103 ± 2 |
| 0221C      | 102 ± 5                       | 103 ± 5  | 102 ± 4 | 93 ± 1  |
| 0241C      | 101 ± 1                       | 101 ± 2  | 99 ± 2  | 99 ± 6  |
| 0321B      | 101 ± 2                       | 102 ± 1  | 102 ± 1 | 97 ± 1  |
| 04G21      | 105 ± 8                       | 109 ± 11 | 106 ± 8 | 92 ± 1  |
| 04G51      | 100 ± 1                       | 102 ± 1  | 101 ± 2 | 88 ± 5  |
| 0521B      | 102 ± 1                       | 99 ± 1   | 99 ± 2  | 92 ± 4  |
| 0621B i    | 104 ± 7                       | 102 ± 1  | 105 ± 7 | 86 ± 4  |
| 0641B      | 102 ± 6                       | 102 ± 2  | 101 ± 3 | 97 ± 2  |
| 0721B      | 107 ± 6                       | 109 ± 4  | 111 ± 4 | 110 ± 3 |
| 0821B i    | 104 ± 2                       | 103 ± 1  | 104 ± 1 | 78 ± 10 |
| 0841B      | 102 ± 4                       | 100 ± 2  | 97 ± 1  | 76 ± 4  |
| 0921B      | 101 ± 2                       | 104 ± 4  | 102 ± 3 | 96 ± 4  |
| 0941B      | 101 ± 3                       | 100 ± 4  | 99 ± 5  | 97 ± 2  |
| 1021C      | 101 ± 2                       | 102 ± 5  | 99 ± 2  | 68 ± 2  |
| 1121C      | 100 ± 5                       | 98 ± 2   | 96 ± 3  | 86 ± 3  |
| 1221B      | 97 ± 1                        | 98 ± 3   | 96 ± 3  | 90 ± 2  |
| 1321B      | 102 ± 2                       | 102 ± 1  | 101 ± 4 | 91 ± 3  |
| 1411B      | 103 ± 5                       | 102 ± 6  | 102 ± 2 | 98 ± 2  |
| 1521B      | 103 ± 3                       | 103 ± 2  | 104 ± 4 | 101 ± 2 |
| 1621C      | 103 ± 3                       | 103 ± 4  | 104 ± 2 | 55 ± 2  |
| 1641B      | 102 ± 3                       | 102 ± 1  | 100 ± 2 | 97 ± 2  |
| 1721C      | 102 ± 2                       | 103 ± 3  | 103 ± 4 | 95 ± 2  |
| 1741B      | 100 ± 4                       | 104 ± 3  | 101 ± 4 | 99 ± 1  |
| 1821B      | 102 ± 5                       | 101 ± 3  | 100 ± 1 | 89 ± 3  |
| 1921C      | 102 ± 3                       | 101 ± 2  | 102 ± 2 | 92 ± 1  |
| 2021C      | 101 ± 3                       | 100 ± 2  | 102 ± 3 | 93 ± 3  |
| 2041B      | 102 ± 2                       | 100 ± 1  | 101 ± 3 | 99 ± 2  |
| 2121B i    | 102 ± 1                       | 101 ± 2  | 101 ± 1 | 94 ± 1  |
| 2131B      | 100 ± 4                       | 103 ± 3  | 98 ± 2  | 89 ± 2  |
| 2141B      | 105 ± 2                       | 102 ± 2  | 100 ± 6 | 90 ± 7  |
| 2221B      | 102 ± 1                       | 99 ± 1   | 98 ± 4  | 90 ± 6  |
| 2321C      | 100 ± 4                       | 102 ± 2  | 98 ± 3  | 90 ± 2  |
| 2411B      | 104 ± 2                       | 103 ± 1  | 98 ± 3  | 96 ± 3  |
| 2521C      | 107 ± 3                       | 103 ± 5  | 109 ± 4 | 96 ± 7  |
| 2551B      | 99 ± 1                        | 94 ± 6   | 95 ± 3  | 89 ± 4  |

|                |         |         |         |         |
|----------------|---------|---------|---------|---------|
| <b>2611B</b>   | 108 ± 3 | 106 ± 3 | 108 ± 2 | 97 ± 5  |
| <b>2641B</b>   | 100 ± 1 | 100 ± 4 | 101 ± 3 | 99 ± 2  |
| <b>2721B</b>   | 105 ± 2 | 110 ± 4 | 105 ± 5 | 95 ± 3  |
| <b>2811C</b>   | 101 ± 3 | 103 ± 2 | 102 ± 4 | 99 ± 4  |
| <b>2911B</b>   | 100 ± 4 | 102 ± 1 | 102 ± 5 | 99 ± 1  |
| <b>3021B</b>   | 102 ± 3 | 103 ± 1 | 105 ± 4 | 92 ± 3  |
| <b>3111B</b>   | 108 ± 2 | 108 ± 4 | 109 ± 2 | 104 ± 3 |
| <b>3221B</b>   | 101 ± 4 | 102 ± 3 | 103 ± 4 | 98 ± 3  |
| <b>3321C</b>   | 105 ± 2 | 106 ± 2 | 102 ± 3 | 100 ± 2 |
| <b>3421B i</b> | 103 ± 3 | 102 ± 2 | 99 ± 2  | 99 ± 4  |
| <b>3521B</b>   | 103 ± 2 | 100 ± 4 | 102 ± 4 | 98 ± 4  |
| <b>3611B</b>   | 92 ± 2  | 92 ± 2  | 95 ± 2  | 72 ± 3  |
| <b>0122B i</b> | 98 ± 4  | 99 ± 4  | 96 ± 5  | 94 ± 2  |
| <b>0142B</b>   | 103 ± 3 | 103 ± 5 | 104 ± 2 | 95 ± 3  |
| <b>0222C</b>   | 101 ± 5 | 102 ± 3 | 103 ± 3 | 102 ± 4 |
| <b>0242C</b>   | 94 ± 3  | 97 ± 2  | 94 ± 2  | 96 ± 4  |
| <b>0322B</b>   | 97 ± 4  | 102 ± 2 | 99 ± 5  | 92 ± 5  |
| <b>04G22</b>   | 105 ± 4 | 99 ± 3  | 105 ± 2 | 98 ± 3  |
| <b>04G52</b>   | 103 ± 5 | 103 ± 7 | 99 ± 6  | 92 ± 3  |
| <b>0522B</b>   | 102 ± 2 | 103 ± 3 | 104 ± 5 | 93 ± 2  |
| <b>0622B i</b> | 104 ± 3 | 101 ± 2 | 98 ± 2  | 94 ± 1  |
| <b>0642B</b>   | 103 ± 1 | 102 ± 3 | 100 ± 4 | 101 ± 2 |
| <b>0722B</b>   | 101 ± 2 | 100 ± 1 | 101 ± 2 | 92 ± 3  |
| <b>0822B i</b> | 102 ± 3 | 110 ± 5 | 106 ± 4 | 104 ± 2 |
| <b>0842B</b>   | 95 ± 4  | 94 ± 4  | 97 ± 3  | 95 ± 2  |
| <b>0922B</b>   | 95 ± 5  | 96 ± 2  | 98 ± 2  | 80 ± 3  |
| <b>0942B</b>   | 91 ± 6  | 100 ± 4 | 99 ± 5  | 89 ± 4  |
| <b>1022C</b>   | 93 ± 2  | 98 ± 4  | 101 ± 1 | 100 ± 4 |
| <b>1122C</b>   | 102 ± 2 | 101 ± 1 | 104 ± 2 | 103 ± 2 |
| <b>1222B</b>   | 100 ± 2 | 103 ± 2 | 104 ± 3 | 101 ± 3 |
| <b>1322B</b>   | 99 ± 1  | 104 ± 1 | 103 ± 3 | 100 ± 4 |
| <b>1412B</b>   | 98 ± 5  | 98 ± 3  | 103 ± 4 | 89 ± 3  |
| <b>1522B</b>   | 100 ± 3 | 102 ± 2 | 104 ± 1 | 102 ± 2 |
| <b>1622C</b>   | 106 ± 1 | 108 ± 2 | 108 ± 1 | 102 ± 2 |
| <b>1642B</b>   | 102 ± 3 | 98 ± 2  | 103 ± 4 | 96 ± 7  |
| <b>1722C</b>   | 105 ± 1 | 108 ± 2 | 107 ± 1 | 109 ± 3 |
| <b>1742B</b>   | 100 ± 1 | 101 ± 5 | 101 ± 4 | 95 ± 5  |
| <b>1822B</b>   | 105 ± 4 | 102 ± 4 | 103 ± 5 | 99 ± 2  |
| <b>1922C</b>   | 100 ± 2 | 101 ± 3 | 100 ± 1 | 96 ± 2  |
| <b>2022C</b>   | 100 ± 1 | 101 ± 3 | 103 ± 2 | 99 ± 2  |
| <b>2042B</b>   | 100 ± 4 | 99 ± 3  | 101 ± 2 | 97 ± 5  |
| <b>2122B i</b> | 100 ± 1 | 102 ± 3 | 105 ± 2 | 104 ± 3 |

|                |         |         |         |         |
|----------------|---------|---------|---------|---------|
| <b>2132B</b>   | 100 ± 4 | 104 ± 3 | 103 ± 5 | 105 ± 3 |
| <b>2142B</b>   | 100 ± 1 | 101 ± 3 | 99 ± 2  | 95 ± 2  |
| <b>2222B</b>   | 102 ± 4 | 98 ± 4  | 90 ± 2  | 89 ± 4  |
| <b>2322C</b>   | 100 ± 4 | 104 ± 3 | 103 ± 5 | 105 ± 3 |
| <b>2412B</b>   | 102 ± 3 | 99 ± 1  | 101 ± 3 | 98 ± 5  |
| <b>2522C</b>   | 101 ± 2 | 99 ± 3  | 102 ± 2 | 94 ± 2  |
| <b>2552B</b>   | 102 ± 1 | 101 ± 3 | 103 ± 2 | 98 ± 4  |
| <b>2612B</b>   | 93 ± 5  | 95 ± 5  | 95 ± 4  | 98 ± 7  |
| <b>2642B</b>   | 96 ± 3  | 95 ± 2  | 96 ± 4  | 97 ± 3  |
| <b>2722B</b>   | 95 ± 6  | 96 ± 4  | 100 ± 2 | 75 ± 4  |
| <b>2812C</b>   | 97 ± 2  | 96 ± 2  | 99 ± 1  | 94 ± 2  |
| <b>2912B</b>   | 100 ± 5 | 102 ± 6 | 99 ± 1  | 95 ± 3  |
| <b>3022B</b>   | 97 ± 1  | 95 ± 2  | 98 ± 2  | 97 ± 2  |
| <b>3112B</b>   | 102 ± 3 | 105 ± 2 | 98 ± 3  | 94 ± 7  |
| <b>3222B</b>   | 91 ± 2  | 89 ± 2  | 96 ± 2  | 103 ± 2 |
| <b>3322C</b>   | 100 ± 2 | 101 ± 3 | 99 ± 1  | 94 ± 2  |
| <b>3422B i</b> | 100 ± 3 | 98 ± 5  | 99 ± 4  | 98 ± 2  |
| <b>3522B</b>   | 99 ± 3  | 102 ± 3 | 98 ± 7  | 95 ± 4  |
| <b>3612B</b>   | 94 ± 2  | 94 ± 2  | 95 ± 3  | 94 ± 4  |



**Table S3.** UHPLC-qTOF-MS/MS analysis of NAE\_2022C active fraction (F7+F8)

| Compound                  | Molecular formula                                           | RT [min] | Calculated m/z [M+H] <sup>+</sup> | Experimental m/z [M+H] <sup>+</sup> | $\Delta m/z$ [ppm] | $\Delta m/z$ [mDa] | Structure                                                                             |
|---------------------------|-------------------------------------------------------------|----------|-----------------------------------|-------------------------------------|--------------------|--------------------|---------------------------------------------------------------------------------------|
| LDGTS 16:0                | C <sub>26</sub> H <sub>51</sub> NO <sub>6</sub>             | 6.28     | 473.373                           | 474.381                             | 3.888              | 1.844              | 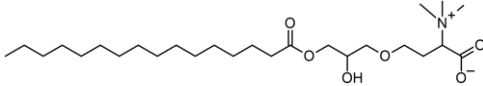   |
| 5-Phenylvaleric acid      | C <sub>11</sub> H <sub>14</sub> O <sub>2</sub>              | 9.16     | 178.099                           | 179.106                             | 4.849              | 0.869              |    |
| Oleamide                  | C <sub>18</sub> H <sub>35</sub> NO                          | 10.08    | 281.273                           | 282.280                             | 1.954              | 0.552              |    |
| Theophylline              | C <sub>7</sub> H <sub>8</sub> N <sub>4</sub> O <sub>2</sub> | 10.57    | 180.081                           | 181.088                             | 0.995              | 0.194              |    |
| DGTS 32:0; DGTS 16:0-16:0 | C <sub>42</sub> H <sub>81</sub> NO <sub>7</sub>             | 11.43    | 712.612                           | 712.619                             | 0.768              | 0.424              |   |
| DGTS 34:0; DGTS 16:0-18:0 | C <sub>44</sub> H <sub>85</sub> NO <sub>7</sub>             | 11.41    | 739.636                           | 740.643                             | 3.911              | 2.896              |  |
